# Supplementary material
Source: Research Square preprint supplement (doi:10.21203/rs.3.rs-9979749/v1)
Supplement: Supplementary file 1 [file 039c7b5b3a7457eb07c1a86c.docx]

Spearman rank correlation analysis between exercise levels within the expert group and ALFF (all 22 channels)

| **Channel** | **ROI** | **Spearman ρ** | **p** | **FDR-p** |
| --- | --- | --- | --- | --- |
| CH1 | VLPFC_L | -0.359 | .110 | .605 |
| CH2 | DLPFC_L | +0.043 | .853 | .965 |
| CH3 | OFC_L | -0.023 | .921 | .965 |
| CH4 | OFC_L | +0.023 | .921 | .965 |
| CH5 | OFC_R | +0.230 | .316 | .957 |
| CH6 | DLPFC_R | -0.073 | .752 | .965 |
| CH7 | VLPFC_R | -0.181 | .433 | .965 |
| CH8 | VLPFC_L | -0.223 | .332 | .957 |
| CH9 | VLPFC_L | +0.029 | .902 | .965 |
| CH10 | FPC_L | +0.027 | .907 | .965 |
| CH11 | OFC_L | +0.065 | .781 | .965 |
| CH12 | OFC_R | +0.083 | .720 | .965 |
| CH13 | FPC_R | +0.141 | .543 | .965 |
| CH14 | VLPFC_R | +0.125 | .590 | .965 |
| CH15 | VLPFC_R | -0.472 | .031 | .341 |
| CH16 | VLPFC_L | -0.215 | .348 | .957 |
| CH17 | DLPFC_L | +0.033 | .887 | .965 |
| CH18 | FPC_L | +0.277 | .224 | .957 |
| CH19 | FPC_R | +0.571 | .007 | .154 |
| CH20 | FPC_R | -0.006 | .980 | .980 |
| CH21 | DLPFC_R | +0.030 | .897 | .965 |
| CH22 | VLPFC_R | -0.379 | .090 | .605 |

Note. n = 21 (expert group);exercise level coded in three grades (1 = none, 2 = level 2, 3 = above level 2). At the uncorrected level, CH19 (FPC_R, ρ = .571, p = .007) and CH15 (VLPFC_R, ρ = −.472, p = .031) reached statistical significance, but both were not significant after FDR correction across 22 channels. Those marked with * have FDR-p < .05.
