# Supplementary material
Source: Research Square preprint supplement (doi:10.21203/rs.3.rs-9979749/v1)
Supplement: Supplementary file 2 [file 8b1ed8a2d2e258baa7629cce.docx]

**Spearman rank correlation analysis between exercise levels within the expert group and zALFF**

| **Channel** | **ROI** | **Spearman ρ** | **p** | **FDR-p** |
| --- | --- | --- | --- | --- |
| CH1 | VLPFC_L | -0.253 | .269 | .437 |
| CH2 | DLPFC_L | +0.310 | .171 | .437 |
| CH3 | OFC_L | -0.312 | .169 | .437 |
| CH4 | OFC_L | -0.095 | .683 | .835 |
| CH5 | OFC_R | +0.250 | .275 | .437 |
| CH6 | DLPFC_R | +0.281 | .217 | .437 |
| CH7 | VLPFC_R | -0.250 | .275 | .437 |
| CH8 | VLPFC_L | -0.253 | .269 | .437 |
| CH9 | VLPFC_L | -0.053 | .819 | .894 |
| CH10 | FPC_L | +0.169 | .463 | .637 |
| CH11 | OFC_L | -0.067 | .771 | .893 |
| CH12 | OFC_R | -0.017 | .941 | .941 |
| CH13 | FPC_R | +0.414 | .062 | .437 |
| CH14 | VLPFC_R | +0.139 | .547 | .708 |
| CH15 | VLPFC_R | -0.382 | .088 | .437 |
| CH16 | VLPFC_L | -0.217 | .345 | .506 |
| CH17 | DLPFC_L | -0.043 | .853 | .894 |
| CH18 | FPC_L | +0.297 | .191 | .437 |
| CH19 | FPC_R | +0.353 | .116 | .437 |
| CH20 | FPC_R | +0.273 | .232 | .437 |
| CH21 | DLPFC_R | +0.319 | .159 | .437 |
| CH22 | VLPFC_R | -0.248 | .278 | .437 |

Note. n = 21 (expert group); exercise level coded as grade three, see Supplementary Table S2. At both uncorrected and FDR-corrected levels, correlation analyses for all 22 channels did not reach statistical significance (all p > .05); CH13 (FPC_R, ρ = .414, p = .062) and CH15 (VLPFC_R, ρ = −.382, p = .088) showed a trend toward significance but did not reach the statistical threshold.
