# Supplementary material
Source: Research Square preprint supplement (doi:10.21203/rs.3.rs-9979749/v1)
Supplement: Supplementary file 3 [file 9645e1904c630ada708cced2.docx]

Spearman rank correlation analysis between years of training within the expert group and ALFF (all 22 channels)

| **Channel** | **ROI** | **Spearman ρ** | **p** | **FDR-p** |
| --- | --- | --- | --- | --- |
| CH1 | VLPFC_L | -0.199 | .386 | .708 |
| CH2 | DLPFC_L | -0.219 | .339 | .678 |
| CH3 | OFC_L | -0.364 | .105 | .480 |
| CH4 | OFC_L | -0.368 | .101 | .480 |
| CH5 | OFC_R | -0.316 | .163 | .512 |
| CH6 | DLPFC_R | -0.103 | .658 | .766 |
| CH7 | VLPFC_R | -0.091 | .696 | .766 |
| CH8 | VLPFC_L | -0.145 | .530 | .766 |
| CH9 | VLPFC_L | +0.105 | .649 | .766 |
| CH10 | FPC_L | -0.323 | .154 | .512 |
| CH11 | OFC_L | -0.443 | .045 | .480 |
| CH12 | OFC_R | -0.364 | .105 | .480 |
| CH13 | FPC_R | -0.264 | .248 | .606 |
| CH14 | VLPFC_R | +0.232 | .312 | .678 |
| CH15 | VLPFC_R | -0.049 | .833 | .873 |
| CH16 | VLPFC_L | -0.131 | .571 | .766 |
| CH17 | DLPFC_L | -0.288 | .206 | .567 |
| CH18 | FPC_L | -0.360 | .109 | .480 |
| CH19 | FPC_R | -0.117 | .615 | .766 |
| CH20 | FPC_R | -0.028 | .902 | .902 |
| CH21 | DLPFC_R | -0.099 | .668 | .766 |
| CH22 | VLPFC_R | +0.131 | .573 | .766 |

Note. ρ = Spearman rank correlation coefficient; p = uncorrected two-tailed significance; FDR-p = p value corrected for 22 channels using the Benjamini–Hochberg method (m = 22). An asterisk indicates FDR-p < .05. In this analysis, CH11 (OFC_L) reached statistical significance at the uncorrected level (ρ = −.443, p = .045), but was not significant after FDR correction for 22 channels. CH = channel; ROI = region of interest; DLPFC = dorsolateral prefrontal cortex; VLPFC = ventrolateral prefrontal cortex; FPC = frontopolar cortex; OFC = orbitofrontal cortex; L = left; R = right.
